# Supplementary material
Source: HighWire-hosted journal article supplement (https://jnis.bmj.com/highwire/filestream/172656/field_highwire_adjunct_files/0/neurintsurg-2022-018917supp001_data_supplement.pdf)
Supplement: neurintsurg-2022-018917supp001_data_supplement.pdf [file neurintsurg-2022-018917supp001_data_supplement.pdf]

| <b>Group</b>                                                                                                                                                       | <b>Yun Peng Huang</b>                                                     | <b>Albert L Rhoton, Jr</b>                   |
|--------------------------------------------------------------------------------------------------------------------------------------------------------------------|---------------------------------------------------------------------------|----------------------------------------------|
| <b>Superior</b>                                                                                                                                                    | <b>Galen</b>                                                              | <b>Galen</b>                                 |
|                                                                                                                                                                    | Precentral                                                                | Cerebellomesencephalic Fissure               |
|                                                                                                                                                                    | Brachial Tributary of Precentral                                          | Superior Cerebellar Peduncle                 |
|                                                                                                                                                                    | Superior Cerebellar                                                       | Not Named                                    |
|                                                                                                                                                                    | Posterior Mesencephalic                                                   | Peduncular                                   |
| <b>Anterior</b>                                                                                                                                                    | <b>Petrosal</b>                                                           | <b>Superior Petrosal</b>                     |
|                                                                                                                                                                    | Anterior Pontomesencephalic                                               | Anterior Medial / Lateral Pontomesencephalic |
|                                                                                                                                                                    | Brachial Tributary of Petrosal                                            | Pontotrigeminal                              |
|                                                                                                                                                                    | Lateral Pontine                                                           | Middle Cerebellar Peduncle                   |
|                                                                                                                                                                    | Lateral Recess, vertical part                                             | Cerebellopontine Fissure                     |
|                                                                                                                                                                    | Anterior Medullary                                                        | Medial / Lateral Anterior Medullary          |
|                                                                                                                                                                    | Vein of Restiform Body                                                    | Lateral Medullary                            |
|                                                                                                                                                                    | Lateral Recess, horizontal part                                           | Cerebellomedullary Fissure                   |
|                                                                                                                                                                    | Great Horizontal Fissure                                                  | Anterior Hemispheric/Petrosal Fissure        |
| <b>Other Venous Nomenclature Homologs and Approximate Correlates*</b>                                                                                              |                                                                           |                                              |
|                                                                                                                                                                    | Superficial Middle Cerebral ~ Superficial Sylvian                         |                                              |
|                                                                                                                                                                    | Paracavernous Sinus ~ Sphenobasal Sinus                                   |                                              |
|                                                                                                                                                                    | Transitional ~ Microfistulous ~ Arterialized Developmental Venous Anomaly |                                              |
|                                                                                                                                                                    | Developmental Venous Anomaly ~ Medullary Venous Malformation              |                                              |
|                                                                                                                                                                    | Rolando ~ Trolard ~ Superior Anastomotic                                  |                                              |
|                                                                                                                                                                    | Labbe ~ Inferior Anastomotic                                              |                                              |
| Table 1: Corresponding nomenclature of posterior fossa veins according to Huang and Rhoton. Only the more important veins which have different names are included. |                                                                           |                                              |
| * Definitions vary among practitioners and across disciplines, with substantial overlap                                                                            |                                                                           |                                              |
